# Supplementary figures and images for: Identification of sterile a-motif domain-containing 9-like as a potential biomarker in patients with cutaneous melanoma
Source: PeerJ journal article supplement (doi:10.7717/peerj.15634), 2023-07-05

**A****GSE15605**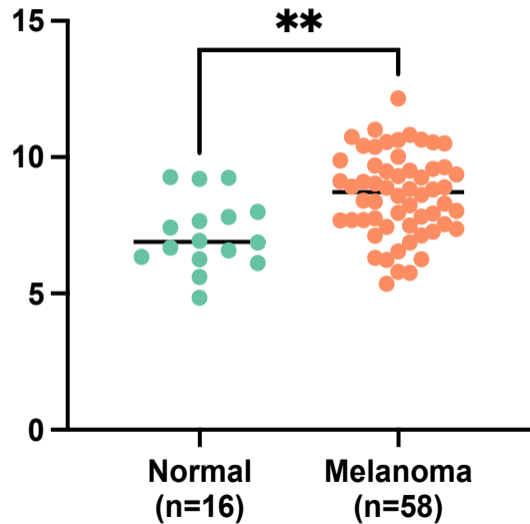**B****GSE156030**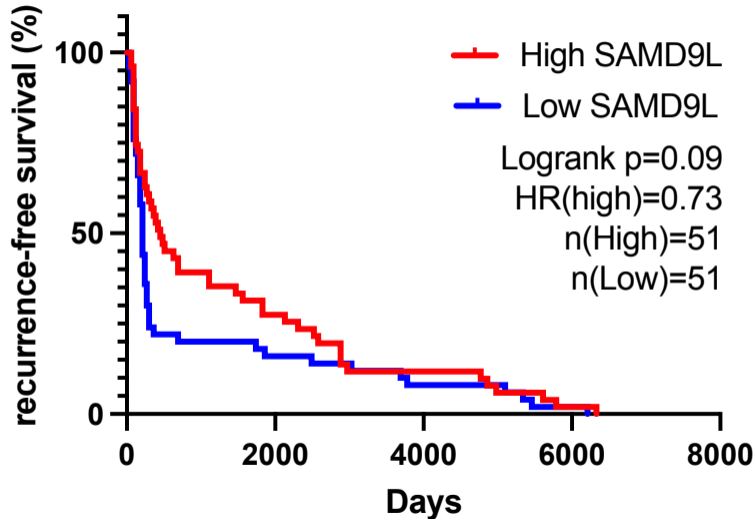

Supplement: FigS1.pdf [file FigS1.pdf]

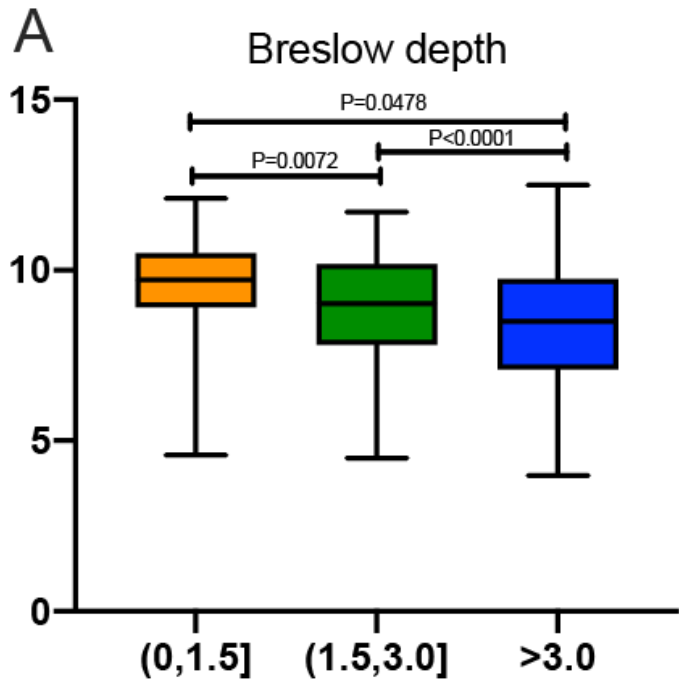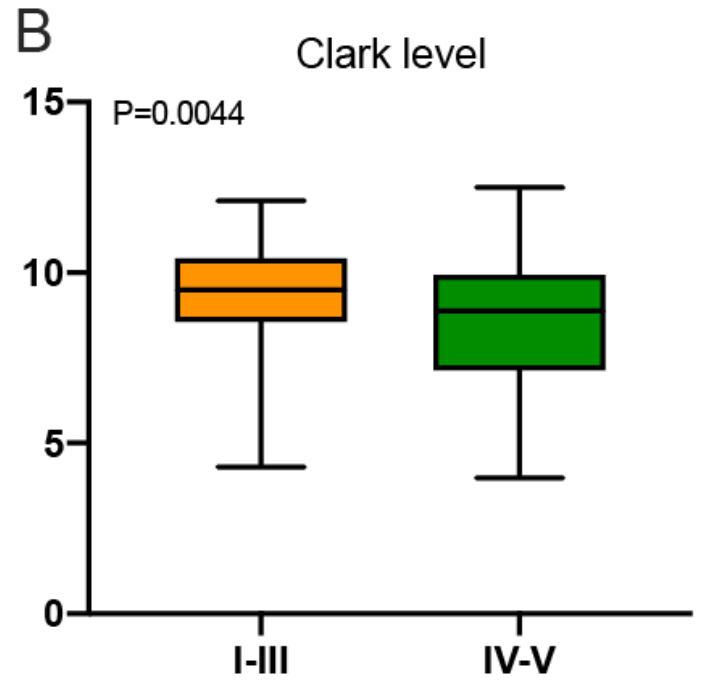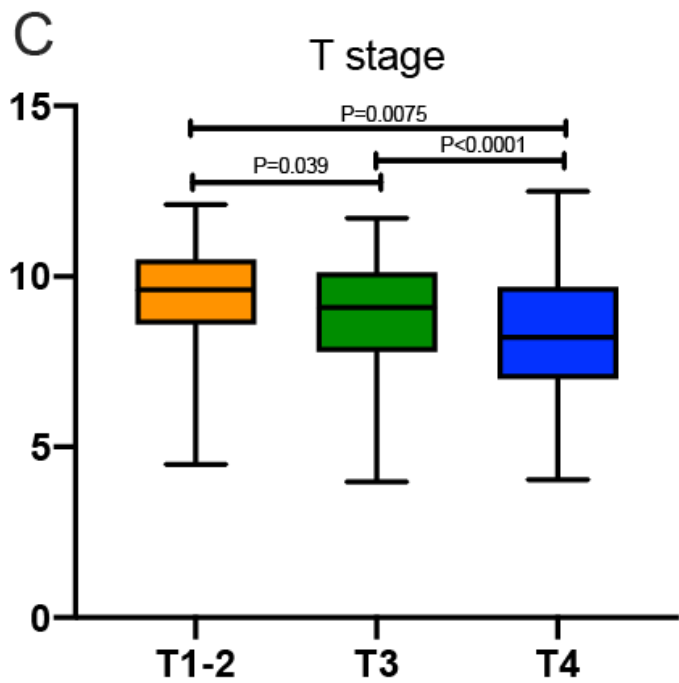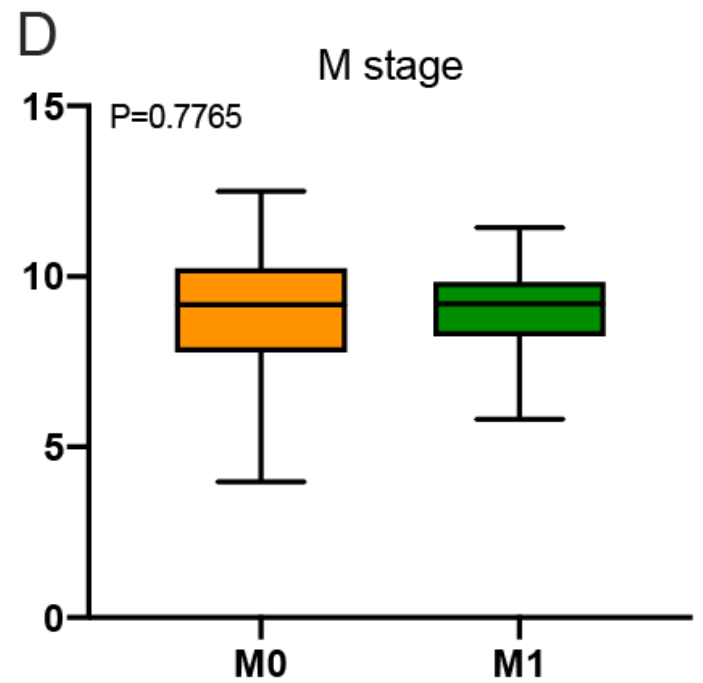

Supplement: FigS2.pdf [file FigS2.pdf]

**A****OS**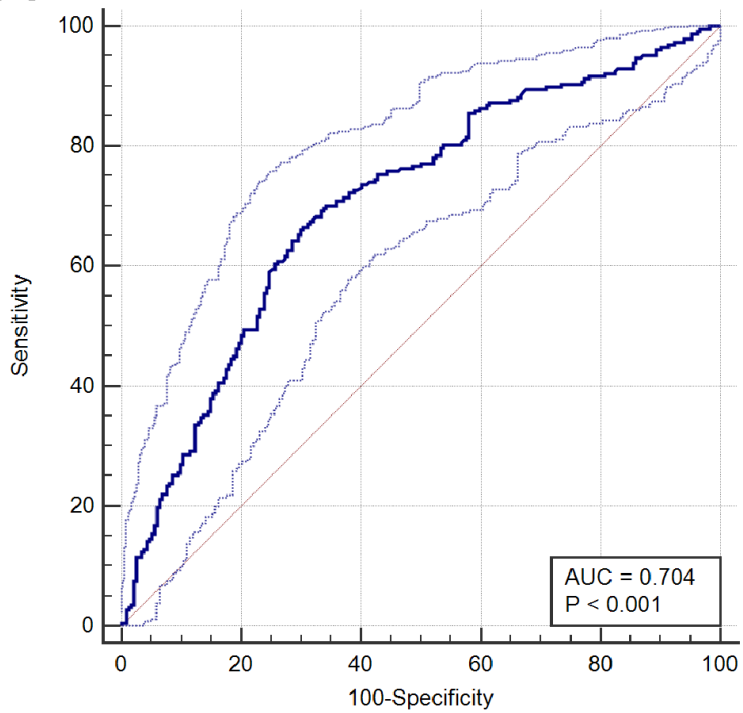**B****RFS**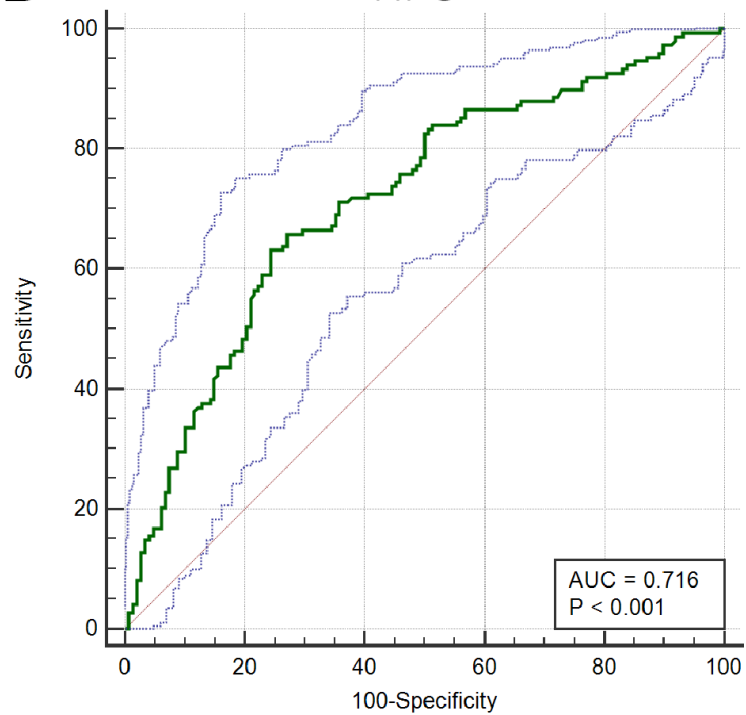

Supplement: FigS3.pdf [file FigS3.pdf]

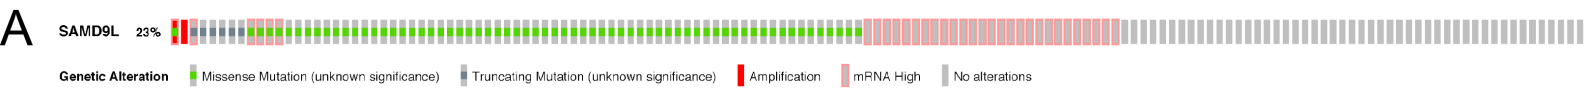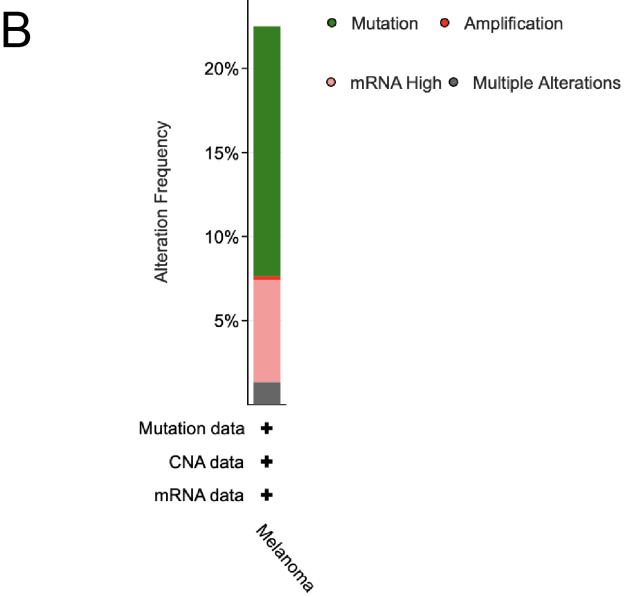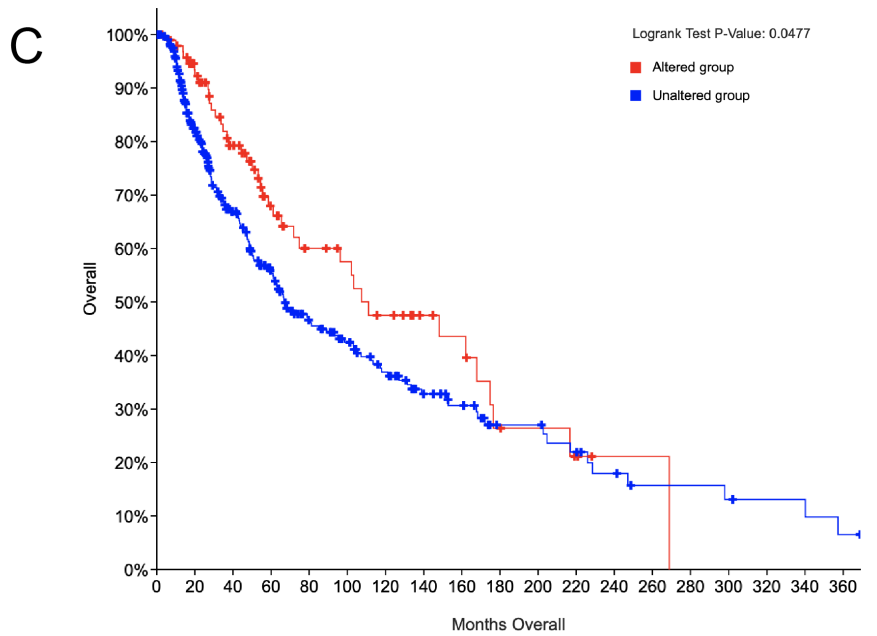

Supplement: FigS4.pdf [file FigS4.pdf]
